# Supplementary material for: Determinants of Wealth Related Inequalities in Full Childhood Vaccination in Nepal: A Decomposition Analysis Using Nepal Demographic and Health Survey (NDHS) 2022
Source: Research Square preprint supplement (doi:10.21203/rs.3.rs-4337229/v1), 2024-08-09
Supplement: Supplementary file 1 [file 51dd93defe7a486ea327f87b.docx]

**Supplementary Table 1 : Descriptive Definition of Explanatory Variables**

| **Variables** | **Categories** | **Definition** |
| --- | --- | --- |
| **Geographic Characteristics** | | |
| Provinces | Koshi, Madhesh, Bagmati, Gandaki, Lumbini, Karnali, Sudurpaschim | Seven provinces |
| Place of Residence | Urban, Rural | Respondents at the time of the survey live either in rural or urban places. |
| Ecological Zone | Hill, Mountain, Terai | Three zones horizontal division |
| **Sociodemographic Characteristics** | | |
| Mother’s Age | 15-19;20 -24; 25-29;30-34, and 35 and Above | Age of mothers at the time of the interview |
| Caste/Ethnicity | Brahmin, Chhetri, Madheshi, Terai Janajati, Hill Janajati, Dalit, Muslim | Categorized into seven caste/ethnicities, others were merged into the Madheshi caste |
| Maternal Education | No Education, Primary, Some Secondary, & Higher | No education, meaning illiterate, classes (1-8) are in primary, and those from class 9 to 10 are in some secondary, above SLC are in higher categories. |
| Wealth Quintile | Poorest, Poorer, Middle, Richer, Richest | Five quintiles |
| Sex of Child | Male, Female | Sex of the index child |
| Birth Order | First, Second,  Third and More | Birth order of a most recent child |
| Household Size | 1-3, 4-5, 6+ | Number of members in the sampled household |
| Mother’s Media Exposure | Not at All, At Least Once a Week, More Than Once a Week | Frequency of exposure to any mass media (radio/television/newspaper) in a week |
| Mother’s Work in Past 12 Months | Yes, No | Mother’s engagement in employment in the past year |
| **Maternal Health Service Use, Service Accessibility & Awareness of HMG Meeting in Ward** | | |
| ANC ≥ 4 | Yes, No | No of respondent’s ANC checkups in last pregnancy |
| Place of Delivery | Health Facility, Elsewhere | Institutional delivery of last birth for respondent(mother) |
| Money Needed to Visit Health as a Big Problem | As Big Problem, Not As a Big Problem | Asked to respondent(mother) about the money needed to visit health facility as a big problem |
| Distance of Health Facility as a Big Problem | As Big Problem, Not As a Big Problem | Asked to respondent(mother) about accessibility of health facility in terms of distance as big problem |
| Awareness of HMG in Ward | Yes, No | Asked respondent about whether they were aware of HMGs in the ward |

**Supplementary Table 2: Variance Inflation Factors of Variables Used in Study**

| **Variables** | **VIFs** |
| --- | --- |
| **Province** |  |
| Madhesh | 2.87 |
| Bagmati | 1.98 |
| Gandaki | 1.61 |
| Lumbini | 1.83 |
| Karnali | 2.63 |
| Sudurpaschim | 2.26 |
| **Ecological Zone** |  |
| Hill | 3.31 |
| Terai | 6.05 |
| **Child Sex** |  |
| Female | 1.01 |
| **Mother's Age(Years)** |  |
| 20-24 | 3.31 |
| 25-29 | 3.66 |
| 30-34 | 3.07 |
| 35-49 | 2.26 |
| **Maternal Education** |  |
| Primary | 2.41 |
| Some Secondary | 2.78 |
| SLC and Higher | 2.71 |
| **Caste/Ethnicity** |  |
| Chhetri Hill | 3.7 |
| Terai Caste | 3.96 |
| Dalit | 3.77 |
| Hill Janajati | 3.56 |
| Terai Janajati | 2.52 |
| Muslim | 2.19 |
| **Wealth Quintile** |  |
| Poorer | 1.66 |
| Middle | 2.03 |
| Richer | 2.18 |
| Richest | 2.21 |
| **Household Size** |  |
| Four-Five | 2.55 |
| Six-Twenty Six | 2.7 |
| Birth Order |  |
| Two-Three | 1.62 |
| Four Plus | 2.12 |
| **Mother's Employmemt (Past 12 Months)** |  |
| Yes | 1.32 |
| **Exposure to Mass Media** |  |
| Less Than Once a Week | 1.71 |
| Atleast Once a Week | 1.92 |
| **Place of Delivery** |  |
| Health Facility | 1.28 |
| **HMG Meeting in Ward** |  |
| Yes | 1.26 |
| **Distance of Health Facility** |  |
| Big Problem | 1.46 |
| **Money Needed to Visit HF** |  |
| Big Problem | 1.33 |
| **Mean VIF** | 2.42 |

**Supplementary Table 3: Determinants of Full Vaccination Among Children in Nepal, NDHS 2022**

| **Variables** | **COR (95% CI)** | **P -Valuea** | **AOR (95% CI)** | **P-Valueb** |
| --- | --- | --- | --- | --- |
| **Geographic Characteristics** |  |  |  |  |
| **Province** |  | <0.001 |  | 0.181 |
| Koshi | 1.00 |  | 1.00 |  |
| Madhesh | 0.48 (0.26-0.90) * |  | 0.80(0.32-2.01) |  |
| Bagmati | 1.19(0.52-2.69) |  | 0.88(0.39-1.99) |  |
| Gandaki | 3.34 (1.21-9.23) * |  | 2.30(0.76-6.98) |  |
| Lumbini | 1.37(0.65-2.93) |  | 1.30(0.52-3.25) |  |
| Karnali | 1.27(0.61-2.67) |  | 2.00(0.84-4.77) |  |
| Sudurpaschim | 1.88(0.90-3.95) |  | 1.58(0.61-4.12) |  |
| **Sociodemographic Characteristics** |  |  |  |  |
| **Sex of Child** |  | 0.214 |  | 0.402 |
| Male | 1.00 |  | 1.00 |  |
| Female | 0.81(0.58-1.13) |  | 0.86(0.60-1.23) |  |
| **Maternal Education** |  | <0.001 |  | 0.903 |
| No Education | 1.00 |  | 1.00 |  |
| Primary Education | 2.24(1.33-3.77) ** |  | 1.18(0.66-2.08) |  |
| Some Secondary Education | 3.31(1.89-5.82) *** |  | 1.22(0.63-2.34) |  |
| SLC and Above Education | 3.43(1.76-6.70) *** |  | 1.03(0.47-2.26) |  |
| **Mother’s Age** |  | 0.15 |  | 0.361 |
| 15-19 | 1.00 |  | 1.00 |  |
| 20-24 | 1.45(0.76-2.77) |  | 1.10(0.55-2.23) |  |
| 25-29 | 1.55(0.82-2.93) |  | 1.16(0.52-2.59) |  |
| 30-34 | 2.66(1.19-5.93) |  | 2.26(0.77-6.63) |  |
| 35-49 | 1.10(0.44-2.71) |  | 0.89(0.29-2.74) |  |
| **Caste/Ethnicity** |  | <0.001 |  | 0.259 |
| Brahmin Hill | 1.00 |  | 1.00 |  |
| Chhetri Hill | 0.63(0.23-1.72) |  | 0.63(0.22-1.81) |  |
| Terai Caste | 0.28(0.10-0.74) * |  | 0.60(0.20-1.82) |  |
| Dalit | 0.23(0.09-0.58) |  | 0.44(0.16-1.75) |  |
| Hill Janajati | 0.67(0.26-1.69) |  | 1.08(0.41-2.81) |  |
| Terai Janajati | 1.00(0.29-3.45) |  | 129(0.36-4.63) |  |
| Muslim | 0.20(0.07-0.61) ** |  | 053(0.16-1.75) |  |
| **Wealth Status** |  | <0.05 |  | 0.166 |
| Poorest | 1.00 |  | 1.00 |  |
| Poorer | 0.87(0.53-1.45) |  | 1.04(059-1.81) |  |
| Middle | 1.81(1.03-3.17) * |  | 2.11(1.06-4.22) * |  |
| Richer | 1.83(1.03-3.25) * |  | 1.74(0.86-3.53) |  |
| Richest | 1.53(0.77-3.04) |  | 1.26(0.54-2.95) |  |
| **Household Size** |  | <0.01 |  | <0.05 |
| Large(six-twenty six) | 1.00 |  | 1.00 |  |
| Medium(four-five) | 1.20(0.78-1.85) |  | 0.96(0.60-1.54) |  |
| Small(one-three) | 2.91(1.48-5.72) ** |  | 2.38(1.17-4.82) * |  |
| **Birth Order** |  | <0.001 |  | 0.123 |
| One | 2.53(1.53-4.17) *** |  | 1.42(0.61-3.33) |  |
| Two-Three | 2.44(1.51-3.95) *** |  | 1.93(0.91-4.11) |  |
| Four Plus | 1.00 |  | 1.00 |  |
| **Mother’s Employment (Past 12 Months)** |  | <0.01 |  | 0.069 |
| No | 1.00 |  | 1.00 |  |
| Yes | 1.80**(1.21-2.66) |  | 1.50(0.97-2.33) |  |
| **Exposure to Mass Media** |  | <0.01 |  | 0.934 |
| No Exposure | 1.00 |  | 1.00 |  |
| Less than Once a Week | 1.62(1.02-2.58)* |  | 0.97(0.60-155) |  |
| Atleast Once a Week | * |  | 1.06(0.66-1.70) |  |
| **Maternal Health Service Use,** |  |  |  |  |
| **ANC Visit** |  | <0.001 |  | <0.05 |
| Less than Four | 1.00 |  | 1.00 |  |
| Four or More | 2.40(1.60-3.60) *** |  | 1.64(1.09-2.48) * |  |
| **Place of Delivery** |  | <0.001 |  | 0.079 |
| Elsewhere | 1.00 |  | 1.00 |  |
| Health Facility | 2.10(1.45-3.04) *** |  | 1.43(0.96-2.15) |  |
| **Distance of Health Facility** |  | <0.05 |  | 0.568 |
| Big Problem | 1.00 |  | 1.00 |  |
| Not Big Problem | 1.63(1.10-2.41) * |  | 1.14(0.72-1.81) |  |
| **Money Needed to Visit** |  | <0.001 |  | <0.05 |
| Big Problem |  |  |  |  |
| Not Big Problem | 1.96(1.36-2.82) *** |  | 1.56(1.03-2.37) * |  |
| **Aware of HMG in Ward** |  | <0.001 |  | <0.05 |
| No | 1.00 |  | 1.00 |  |
| Yes | 2.08(1.41-3.06) *** |  | 1.70(1.07-2.68) * |  |

Note: significant at ***p<0.001, **p<0.01, *p<0.05

a represents the p-value of the corresponding variable obtained from the single parameter Wald test

b represents the p-value of the corresponding variable obtained from the multiparameter Wald test

**Supplementary Table 4: Decomposition of Concentration Index (CIX) of childhood full vaccination in Nepal, NDHS 2022**

| **Categories** | **Elasticity** | **Concentration Indices (Determinants)** | **Absolute Contribution to CIX** | **Percentage Contributions** |
| --- | --- | --- | --- | --- |
| **Maternal Education** | | | | |
| No Education | Base | Base | Base | Base |
| Primary Education | 0.02055237 | -0.0830852 | -0.00683039 | -7.5211529 |
| Some Secondary | 0.02094072 | 0.077222 | 0.00646834 | 7.1224829 |
| SLC and Higher Education | 0.00540828 | 0.41442992 | 0.00896541 | 9.8720856 |
| **Overall** | **0.04690137** | **0.40856672** | **0.00860336** | **9.4734156** |
| **Caste/Ethnicity** | | | | |
| Brahmin Hill | Base | Base | Base | Base |
| Chhetri Hill | -0.01124485 | -0.08143766 | 0.00366302 | 4.0334584 |
| Terai Caste | -0.0230811 | 0.15944503 | -0.01472066 | -16.209371 |
| Dalit | -0.02600261 | -0.19757254 | 0.0205496 | 22.627795 |
| Hill Janajati | -0.00627062 | -0.11196447 | 0.00280835 | 3.0923549 |
| Terai Janajati | 0.00221053 | 0.13068301 | 0.00115551 | 1.2723723 |
| Muslim | -0.00812669 | 0.18970106 | -0.00616657 | -6.7901962 |
| **Overall** | **-0.07251534** | **0.08885443** | **0.00728925** | **8.0264134** |
| **Mother Employment** | | | | |
| No | Base | Base | Base | Base |
| **Yes** | **0.03430324** | **-0.12344305** | **-0.01693799** | **-18.650932** |
| **Maternal Age** | | | | |
| 15-19 | Base | Base | Base | Base |
| 20-24 | 0.00961534 | -0.03494853 | -0.00134417 | -1.480104 |
| 25-29 | 0.01243789 | 0.04599081 | 0.00228811 | 2.5195121 |
| 30-34 | 0.0187875 | 0.1172109 | 0.0088084 | 9.699196 |
| 35-49 | -0.0019732 | 0.00216688 | -0.0000171 | -0.01883232 |
| **Overall** | **0.03886753** | **0.13042006** | **0.00973524** | **10.71977178** |
| **Aware of HMG Meeting in the Ward** | | | | |
| No | Base | Base | Base | Base |
| Yes | **0.02397392** | **-0.14211055** | **-0.01362779** | **-15.005971** |
| **ANC ≥ 4 Visits** | | | | |
| No |  |  |  |  |
| **Yes** | **0.04415168** | **0.03876647** | **0.00684642** | **7.538801** |
| **Place of Delivery** | | | | |
| Elsewhere | Base | Base | Base | Base |
| **Health Facility** | **0.04592437** | **0.08734622** | **0.01604528** | **17.667948** |
| **Money to reach Health Facilities** | | | | |
| No | Base | Base | Base | Base |
| **Yes** | **-0.03030601** | **-0.15715024** | **0.01905039** | **20.976961** |
| **Residual Term** |  |  | **0.05299584** | **40.74** |
| **Total** |  |  | **0.0900** | **59.25359222** |
